# Supplementary material for: Smallest deltahedra silicon dicarbide: C2Si32−
Source: Royal Society of Chemistry journal article supplement (doi:10.1039/c5ra22310e), 2015-01-01
Supplement: c5ra22310e1.pdf [file c5ra22310e1.pdf]

Supporting Information available for  
**Smallest deltahedra silicon dicarbide: C<sub>2</sub>Si<sub>3</sub><sup>2-</sup>**

Jing-jing Sui, Jing Xu, Yi-hong Ding\*

*Institute of Theoretical Chemistry, Jilin University, Changchun 130023, People's Republic of  
China.*

- S1. Table S1. For all the singlet C<sub>2</sub>Si<sub>3</sub><sup>2-</sup> isomers, the energies(in a.u.), zero-point energies(in a.u.), the relative energies(in kcal/mol) at B3LYP/aug-cc-pVTZ,CCSD(T)/ aug-cc-pVTZ//B3LYP/aug-cc-pVTZ and PBE0/cc-pVTZ//B3LYP/aug-cc-pVTZ.
- S2. Table S2. For all the triplet C<sub>2</sub>Si<sub>3</sub><sup>2-</sup> isomers, the energies(in a.u.), zero-point energies(in a.u.), the relative energies(in kcal/mol) at B3LYP/aug-cc-pVTZ and CCSD(T)/ aug-cc-pVTZ //B3LYP/aug-cc-pVTZ.
- S3. Table S3. For the CpMg(C<sub>2</sub>Si<sub>3</sub><sup>2-</sup>)MgCp, the energies(in a.u.), zero-point energies(in a.u.), the relative energies(in kcal/mol) at B3LYP/6-31g(d) and PBE0/cc-pVTZ //B3LYP/6-31g(d).
- S4. Table S4. Cartesian coordinates of the isomers in Table S1 at the level of B3LYP/aug-cc-pVTZ.
- S5. Table S5. Cartesian coordinates of the isomers in Table S2 at the level of B3LYP/aug-cc-pVTZ.
- S6. Table S6. Cartesian coordinates of the isomers in Table S3 at the level of B3LYP/6-31g(d).

S1. Table S1. For all the singlet isomers, the energies(in a.u.), zero-point energies(in a.u.), the relative energies(in kcal/mol) at B3LYP/aug-cc-pVTZ, CCSD(T)/ aug-cc-pVTZ //B3LYP/aug-cc-pVTZ and PBE0/ cc-pVTZ //B3LYP/aug-cc-pVTZ

|             | B3LYP/ aug-cc-pVTZ |             |                  | CCSD(T)/aug-cc-pVTZ//B3LYP/aug-cc-pVTZ |             |                  | PBE0/ cc-pVTZ//B3LYP/ aug-cc-pVTZ |             |                  |
|-------------|--------------------|-------------|------------------|----------------------------------------|-------------|------------------|-----------------------------------|-------------|------------------|
|             | E                  | E+ZPVE      | $\Delta E$ +ZPVE | E                                      | E+ZPVE      | $\Delta E$ +ZPVE | E                                 | E+ZPVE      | $\Delta E$ +ZPVE |
| C2Si32-_020 | -944.617433        | -944.607153 | 11.1             | -943.082691                            | -943.072411 | 0                | -944.108196                       | -944.097916 | 0                |
| C2Si32-_019 | -944.631112        | -944.620571 | 2.68             | -943.082781                            | -943.07224  | 0.10730421       | -944.105182                       | -944.094641 | 2.0550953        |
| C2Si32-_015 | -944.635952        | -944.624848 | 0                | -943.081105                            | -943.070001 | 1.5122991        | -944.103143                       | -944.092039 | 3.6878763        |
| C2Si32-_009 | -944.613658        | -944.602808 | 13.83            | -943.069278                            | -943.058428 | 8.77447233       | -944.084504                       | -944.073654 | 15.224648        |
| C2Si32-_001 | -944.609815        | -944.600025 | 15.57            | -943.063958                            | -943.054168 | 11.44766493      | -944.08225                        | -944.07246  | 15.973895        |
| C2Si32-_023 | -944.588033        | -944.578056 | 29.36            | -943.059779                            | -943.049802 | 14.18737359      | -944.081196                       | -944.071219 | 16.752634        |
| C2Si32-_002 | -944.604119        | -944.594193 | 19.23            | -943.054508                            | -943.044582 | 17.46297579      | -944.063698                       | -944.053772 | 27.700801        |
| C2Si32-_011 | -944.604299        | -944.594709 | 18.91            | -943.051307                            | -943.041717 | 19.26079194      | -944.066932                       | -944.057342 | 25.460591        |
| C2Si32-_073 | -944.602655        | -944.592264 | 20.44            | -943.042447                            | -943.032056 | 25.32316605      | -944.061174                       | -944.050783 | 29.576429        |
| C2Si32-_022 | -944.559864        | -944.550134 | 46.88            | -943.031934                            | -943.022204 | 31.50539457      | -944.045196                       | -944.035466 | 39.188           |
| C2Si32-_041 | -944.57554         | -944.567098 | 36.23            | -943.027319                            | -943.018877 | 33.59312034      | -944.043092                       | -944.03465  | 39.700048        |
| C2Si32-_010 | -944.576029        | -944.566218 | 36.79            | -943.028208                            | -943.018397 | 33.89432514      | -944.04531                        | -944.035499 | 39.167292        |
| C2Si32-_012 | -944.568949        | -944.559341 | 41.1             | -943.022165                            | -943.012557 | 37.55898354      | -944.033786                       | -944.024178 | 46.271332        |
| C2Si32-_005 | -944.566458        | -944.557271 | 42.4             | -943.019379                            | -943.010192 | 39.04304469      | -944.029062                       | -944.019875 | 48.971508        |
| C2Si32-_038 | -944.544165        | -944.534784 | 56.51            | -943.002291                            | -942.99291  | 49.88767251      | -944.015164                       | -944.005783 | 57.814379        |
| C2Si32-_016 | -944.532687        | -944.523804 | 63.4             | -942.991582                            | -942.982699 | 56.29517712      | -943.999386                       | -943.990503 | 67.402732        |
| C2Si32-_018 | -944.525887        | -944.517554 | 67.32            | -942.979649                            | -942.971316 | 63.43812345      | -943.983431                       | -943.975098 | 77.069523        |
| C2Si32-_004 | -944.503204        | -944.495291 | 81.29            | -942.964566                            | -942.956653 | 72.63930258      | -943.969255                       | -943.961342 | 85.701551        |
| C2Si32-_070 | -944.475781        | -944.467512 | 98.72            | -942.927781                            | -942.919512 | 95.94565149      | -943.93531                        | -943.927041 | 107.22577        |
| C2Si32-_072 | -944.440913        | -944.433938 | 119.79           | -942.901719                            | -942.894744 | 111.4878192      | -943.89957                        | -943.892595 | 128.84098        |

S2. Table S2. For all the triplet isomers, the energies(in a.u.), zero-point energies(in a.u.), the relative energies(in kcal/mol) at B3LYP/aug-cc-pVTZ and CCSD(T)/ aug-cc-pVTZ //B3LYP/aug-cc-pVTZ

|                 | B3LYP/ aug-cc-pVTZ |             |                 | CCSD(T)/aug-cc-pVTZ//B3LYP/aug-cc-pVTZ |             |                 |
|-----------------|--------------------|-------------|-----------------|----------------------------------------|-------------|-----------------|
|                 | E                  | E+ZPVE      | $\Delta E+ZPVE$ | E                                      | E+ZPVE      | $\Delta E+ZPVE$ |
| C2Si32-_073-tri | -944.621255        | -944.610871 | 0               | -943.058826                            | -943.048442 | 15.04078719     |
| C2Si32-_005-tri | -944.617223        | -944.607044 | 2.4             | -943.056466                            | -943.046287 | 16.39307124     |
| C2Si32-_136-tri | -944.59481         | -944.584244 | 16.7            | -943.052464                            | -943.041898 | 19.14721263     |
| C2Si32-_108-tri | -944.608098        | -944.596638 | 8.93            | -943.052045                            | -943.040585 | 19.97113326     |
| C2Si32-_034-tri | -944.596669        | -944.587025 | 14.96           | -943.045058                            | -943.035414 | 23.21598747     |
| C2Si32-_001-tri | -944.589423        | -944.579296 | 19.81           | -943.042414                            | -943.032287 | 25.17821124     |
| C2Si32-_025-tri | -944.587054        | -944.577167 | 21.14           | -943.041688                            | -943.031801 | 25.4831811      |
| C2Si32-_020-tri | -944.588892        | -944.578691 | 20.19           | -943.039                               | -943.028799 | 27.36696612     |
| C2Si32-_013-tri | -944.585294        | -944.57548  | 22.2            | -943.03648                             | -943.026666 | 28.70544495     |
| C2Si32-_023-tri | -944.571923        | -944.562704 | 30.22           | -943.035729                            | -943.02651  | 28.80333651     |
| C2Si32-_110-tri | -944.586885        | -944.577055 | 21.21           | -943.035533                            | -943.025703 | 29.30973708     |
| C2Si32-_006-tri | -944.586551        | -944.576825 | 21.36           | -943.034525                            | -943.024799 | 29.87700612     |
| C2Si32-_010-tri | -944.583893        | -944.574285 | 22.95           | -943.032456                            | -943.022848 | 31.10127813     |
| C2Si32-_019-tri | -944.583902        | -944.574027 | 23.11           | -943.030419                            | -943.020544 | 32.54706117     |
| C2Si32-_041-tri | -944.585526        | -944.576079 | 21.83           | -943.026425                            | -943.016978 | 34.78476183     |
| C2Si32-_069-tri | -944.578732        | -944.569569 | 25.91           | -943.024873                            | -943.01571  | 35.58044451     |
| C2Si32-_024-tri | -944.561462        | -944.551926 | 36.98           | -943.022709                            | -943.013173 | 37.17243738     |
| C2Si32-_003-tri | -944.583205        | -944.573638 | 23.36           | -943.021339                            | -943.011772 | 38.05157889     |
| C2Si32-_029-tri | -944.56665         | -944.557157 | 33.7            | -943.0136                              | -943.004107 | 42.86144304     |
| C2Si32-_064-tri | -944.555669        | -944.545899 | 40.77           | -943.00509                             | -942.99532  | 48.37537341     |
| C2Si32-_079-tri | -944.558097        | -944.548639 | 39.05           | -942.989395                            | -942.979937 | 58.02835974     |

|                 |             |             |        |             |             |             |
|-----------------|-------------|-------------|--------|-------------|-------------|-------------|
| C2Si32-_038-tri | -944.551341 | -944.542478 | 42.91  | -942.967078 | -942.958215 | 71.65913196 |
| C2Si32-_031-tri | -944.553483 | -944.544059 | 41.92  | -942.96721  | -942.957786 | 71.92833375 |
| C2Si32-_016-tri | -944.508169 | -944.499818 | 69.68  | -942.962158 | -942.953807 | 74.42519604 |
| C2Si32-_081-tri | -944.501474 | -944.492506 | 74.27  | -942.960233 | -942.951265 | 76.02032646 |
| C2Si32-_036-tri | -944.511451 | -944.503152 | 67.59  | -942.959109 | -942.95081  | 76.30584351 |
| C2Si32-_071-tri | -944.507796 | -944.499733 | 69.74  | -942.954894 | -942.946831 | 78.8027058  |
| C2Si32-_004-tri | -944.511027 | -944.502964 | 67.71  | -942.951638 | -942.943575 | 80.84587836 |
| C2Si32-_053-tri | -944.485356 | -944.476819 | 84.11  | -942.951808 | -942.943271 | 81.0366414  |
| C2Si32-_021-tri | -944.484193 | -944.47592  | 84.68  | -942.93937  | -942.931097 | 88.67594814 |
| C2Si32-_042-tri | -944.497629 | -944.489779 | 75.98  | -942.93746  | -942.92961  | 89.60905551 |
| C2Si32-_014-tri | -944.561469 | -944.551446 | 37.28  | -942.938134 | -942.928111 | 90.549693   |
| C2Si32-_072-tri | -944.439748 | -944.432902 | 111.67 | -942.888758 | -942.881912 | 119.5400275 |
| C2Si32-_105-tri | -944.435439 | -944.428726 | 114.29 | -942.878911 | -942.872198 | 125.6356596 |
| C2Si32-_134-tri | -944.410033 | -944.403609 | 130.05 | -942.859353 | -942.852929 | 137.7271498 |
| C2Si32-_011-tri | -944.395889 | -944.388911 | 139.28 | -942.824416 | -942.817438 | 159.9981072 |

S3. Table S3. For the CpMg(C<sub>2</sub>Si<sub>3</sub><sup>2-</sup>)MgCp, the energies(in a.u.), zero-point energies(in a.u.), the relative energies(in kcal/mol) at B3LYP/6-31g(d) and PBE0/ cc-pVTZ //B3LYP/6-31g(d).

|                       | B3LYP/6-31g(d) |              |         | PBE0/ cc-pVTZ //B3LYP/6-31g(d). |              |             |
|-----------------------|----------------|--------------|---------|---------------------------------|--------------|-------------|
|                       | E              | E+ZPVE       | ΔE+ZPVE | E                               | E+ZPVE       | ΔE+ZPVE     |
| C2Si3-CpMg-cage-1     | -1731.90879    | -1731.727784 | 0       | -1730.998425                    | -1730.817419 | 0           |
| CpMg-020-d2-t4        | -1731.905887   | -1731.725001 | 1.74    | -1730.995271                    | -1730.814385 | 1.90386534  |
| CpMg-023-d2-t2        | -1731.889976   | -1731.709931 | 11.2    | -1730.985939                    | -1730.805894 | 7.23205275  |
| CpMg-023-d1-t1        | -1731.885242   | -1731.705419 | 14.03   | -1730.979942                    | -1730.800119 | 10.855923   |
| CpMg-020-d2-t3        | -1731.882836   | -1731.702066 | 16.13   | -1730.972953                    | -1730.792183 | 15.83584236 |
| CpMg-015-d1-d2        | -1731.89576    | -1731.714966 | 8.04    | -1730.971686                    | -1730.790892 | 16.64595777 |
| C2Si3-CpMg-planar-1   | -1731.895712   | -1731.714912 | 8.07    | -1730.971595                    | -1730.790795 | 16.70682624 |
| C2Si3-CpMg-1-ptSi     | -1731.880823   | -1731.700342 | 17.22   | -1730.970068                    | -1730.789587 | 17.46485832 |
| C2Si3-CpMg-planar-C-C | -1731.887095   | -1731.706369 | 13.43   | -1730.963997                    | -1730.783271 | 21.42821148 |
| CpMg-001-t1-s4        | -1731.886925   | -1731.706417 | 13.4    | -1730.962306                    | -1730.781798 | 22.35253371 |
| CpMg-009-d1-t3        | -1731.874375   | -1731.693589 | 21.45   | -1730.961573                    | -1730.780787 | 22.98694632 |
| CpMg-009-d1-d3        | -1731.875683   | -1731.694725 | 20.74   | -1730.961385                    | -1730.780427 | 23.21284992 |
| CpMg-001-d1-t2        | -1731.886328   | -1731.705404 | 14.04   | -1730.961181                    | -1730.780257 | 23.31952662 |
| CpMg-020-d4-t3        | -1731.866326   | -1731.686222 | 26.08   | -1730.96019                     | -1730.780086 | 23.42683083 |
| CpMg-026-s1-t1        | -1731.874091   | -1731.69375  | 21.35   | -1730.959262                    | -1730.778921 | 24.15787998 |
| CpMg-015-d1-s1        | -1731.889576   | -1731.708618 | 12.02   | -1730.958739                    | -1730.777781 | 24.87324138 |
| CpMg-001-d1-t5        | -1731.884278   | -1731.703284 | 15.37   | -1730.957563                    | -1730.776569 | 25.6337835  |
| CpMg-002-s1-t3        | -1731.884243   | -1731.704254 | 14.76   | -1730.951007                    | -1730.771018 | 29.11709151 |
| CpMg-001-d2-t2        | -1731.868076   | -1731.687898 | 25.02   | -1730.951057                    | -1730.770879 | 29.2043154  |
| CpMg-002-s1-t1        | -1731.881095   | -1731.70093  | 16.85   | -1730.946687                    | -1730.766522 | 31.93837647 |
| CpMg-015-d1-t1        | -1731.875783   | -1731.694873 | 20.65   | -1730.94319                     | -1730.76228  | 34.60027389 |

|                |              |              |       |              |              |             |
|----------------|--------------|--------------|-------|--------------|--------------|-------------|
| CpMg-015-d1-s6 | -1731.870561 | -1731.690186 | 23.59 | -1730.941856 | -1730.761481 | 35.10165438 |
| CpMg-011-s1-d8 | -1731.844216 | -1731.664695 | 39.58 | -1730.91746  | -1730.737939 | 49.8744948  |
| CpMg-073-s1-t2 | -1731.844916 | -1731.664672 | 39.6  | -1730.907164 | -1730.72692  | 56.78902749 |

S4. Table S4. Optimized geometries (in angstrom) of the isomers in Table S1 at the level of B3LYP/aug-cc-pVTZ

C2Si32-\_015.log mol=C2Si3(2-)

RB3LYP/Aug-CC-pVTZ HF=-944.635952117 HF+ZPE=-944.624848 lf=117.0608

14 1.144748 1.652779 0.000000

6 0.000000 0.166427 0.000000

14 -1.140771 1.655842 0.000000

6 -0.001793 -1.173767 0.000000

14 -0.003209 -2.876904 0.000000

C2Si32-\_019.log mol=C2Si3(2-)

RB3LYP/Aug-CC-pVTZ HF=-944.631111917 HF+ZPE=-944.620571 lf=113.9393

14 1.203074 -1.453538 0.000000

14 0.000000 0.449575 0.000000

14 -1.202339 -1.454021 0.000000

6 -0.000645 2.241845 0.000000

6 -0.001070 3.493450 0.000000

C2Si32-\_020.log mol=C2Si3(2-)

RB3LYP/Aug-CC-pVTZ HF=-944.617432827 HF+ZPE=-944.607153 lf=216.2447

6 -1.563627 0.648006 0.000000

6 -0.322904 1.097437 0.000000

14 -0.322904 -0.680883 1.196295

14 1.454322 0.613719 0.000000

14 -0.322904 -0.680883 -1.196295

C2Si32-\_009.log mol=C2Si3(2-)

RB3LYP/Aug-CC-pVTZ HF=-944.613658042 HF+ZPE=-944.602808 lf=93.6546

14 -2.171298 -0.053734 0.000000

14 0.000000 0.997778 0.000000

6 -0.643497 -1.038700 0.000000

14 2.171299 -0.053729 0.000000

6 0.643496 -1.038699 0.000000

C2Si32-\_001.log mol=C2Si3(2-)

RB3LYP/Aug-CC-pVTZ HF=-944.609815423 HF+ZPE=-944.600025 lf=121.0979

6 -2.582439 -0.000037 0.646219

6 -1.462518 0.000053 0.055818

14 -0.014993 -1.289319 -0.360084

14 -0.014972 1.289331 -0.360068

14 1.763518 -0.000019 0.419279

C2Si32-\_011.log mol=C2Si3(2-)

RB3LYP/Aug-CC-pVTZ HF=-944.604298691 HF+ZPE=-944.594709 lf=46.6952

6 1.538434 -3.434673 0.000000  
14 -0.701650 -1.380910 0.000000  
6 0.737290 -2.465718 0.000000  
14 0.000000 0.892706 0.000000  
14 -0.273661 3.016943 0.000000

C2Si32-\_002.log mol=C2Si3(2-)  
RB3LYP/Aug-CC-pVTZ HF=-944.604119328 HF+ZPE=-944.594193 lf=69.9889  
6 -1.516340 0.061619 0.000000  
14 -3.077500 -0.559242 0.000000  
6 1.516300 0.061539 0.000000  
14 3.077517 -0.559119 0.000000  
14 0.000000 1.065579 0.000000

C2Si32-\_073.log mol=C2Si3(2-)  
RB3LYP/Aug-CC-pVTZ HF=-944.602655273 HF+ZPE=-944.592264 lf=67.1370  
14 0.019459 3.574464 0.000000  
6 0.008661 1.804331 0.000000  
6 0.000000 0.535491 0.000000  
14 -0.006244 -1.218406 0.000000  
14 -0.016927 -3.358839 0.000000

C2Si32-\_023.log mol=C2Si3(2-)  
RB3LYP/Aug-CC-pVTZ HF=-944.588033305 HF+ZPE=-944.578056 lf=192.4568  
14 0.517883 0.066070 1.604564  
6 0.277284 0.994315 0.000000  
6 0.517883 -0.892796 0.000000  
14 0.517883 0.066070 -1.604564  
14 -1.376552 -0.175648 0.000000

C2Si32-\_010.log mol=C2Si3(2-)  
RB3LYP/Aug-CC-pVTZ HF=-944.576028560 HF+ZPE=-944.566218 lf=68.0082  
6 1.584717 -1.724160 0.000000  
6 0.502706 -0.892140 0.000000  
14 -0.103870 -2.630651 0.000000  
14 0.000000 0.891092 0.000000  
14 -0.790739 2.860831 0.000000

C2Si32-\_041.log mol=C2Si3(2-)  
RB3LYP/Aug-CC-pVTZ HF=-944.575539978 HF+ZPE=-944.567098 lf=46.6088  
6 0.678652 -3.008545 0.000000  
6 1.507940 -2.030865 0.000000  
14 -0.558683 -1.530372 0.000000  
14 0.000000 0.789061 0.000000



14 -0.378428 2.901059 0.000000

C2Si32-\_012.log mol=C2Si3(2-)

RB3LYP/Aug-CC-pVTZ HF=-944.568949473 HF+ZPE=-944.559341 lf=76.5461

6 1.517735 1.377795 0.000000

14 0.000000 0.374238 0.000000

14 0.201204 2.630682 0.000000

6 -0.303568 -1.379399 0.000000

14 -0.721561 -3.004232 0.000000

C2Si32-\_005.log mol=C2Si3(2-)

RB3LYP/Aug-CC-pVTZ HF=-944.566458356 HF+ZPE=-944.557271 lf=66.3182

14 1.772853 -0.822026 0.000000

6 0.000897 -1.157763 0.000000

6 0.000000 0.293422 0.000000

14 -1.771501 -0.824349 0.000000

14 -0.001736 2.016807 0.000000

C2Si32-\_022.log mol=C2Si3(2-)

RB3LYP/Aug-CC-pVTZ HF=-944.559863714 HF+ZPE=-944.550134 lf=315.7004

6 0.000000 1.373432 0.000024

14 0.000000 0.000000 1.389438

14 -1.202983 0.000000 -0.694729

6 0.000000 -1.373432 0.000024

14 1.202983 0.000000 -0.694729

C2Si32-\_038.log mol=C2Si3(2-)

RB3LYP/Aug-CC-pVTZ HF=-944.544165316 HF+ZPE=-944.534784 lf=91.8762

6 0.000000 1.723733 1.046935

14 0.000000 2.029535 -0.708454

14 0.000000 0.000000 0.519535

14 0.000000 -2.029535 -0.708454

6 0.000000 -1.723733 1.046935

C2Si32-\_016.log mol=C2Si3(2-)

RB3LYP/Aug-CC-pVTZ HF=-944.532686828 HF+ZPE=-944.523804 lf=17.0393

14 -1.169798 1.546137 0.000000

6 0.000000 0.132231 0.000000

14 1.157313 1.556284 0.000000

14 0.006979 -1.698942 0.000000

6 0.012846 -3.407013 0.000000

C2Si32-\_018.log mol=C2Si3(2-)

RB3LYP/Aug-CC-pVTZ HF=-944.525887227 HF+ZPE=-944.517554 lf=30.4907

14 -2.982082 -0.700331 0.000000  
14 0.000000 1.044150 0.000000  
6 -1.443498 -0.016159 0.000000  
14 2.007380 -0.298151 0.000000  
6 3.717801 -0.090400 0.000000

C2Si32-\_004.log mol=C2Si3(2-)  
RB3LYP/Aug-CC-pVTZ HF=-944.503204081 HF+ZPE=-944.495291 lf=36.2944  
6 2.963859 0.001174 0.514797  
14 1.436099 0.001084 -0.279267  
14 -0.909041 1.267031 -0.055434  
14 -0.904653 -1.267704 -0.055724  
6 -2.082807 -0.002133 0.396194

C2Si32-\_070.log mol=C2Si3(2-)  
RB3LYP/Aug-CC-pVTZ HF=-944.475780551 HF+ZPE=-944.467512 lf=59.1881  
6 -0.007846 4.080423 0.000000  
14 -0.002450 2.344918 0.000000  
6 0.000000 0.619062 0.000000  
14 0.001982 -1.084693 0.000000  
14 0.003830 -3.274291 0.000000

C2Si32-\_072.log mol=C2Si3(2-)  
RB3LYP/Aug-CC-pVTZ HF=-944.440913421 HF+ZPE=-944.433938 lf=43.2622  
6 0.000000 3.581518 -0.491966  
14 0.000000 1.866343 -0.326381  
14 0.000000 0.000000 1.074447  
14 0.000000 -1.866343 -0.326381  
6 0.000000 -3.581518 -0.491966

S5. Table S5. Optimized geometries (in angstrom) of the isomers in Table S2 at the level of B3LYP/aug-cc-pVTZ

C2Si32-\_073-tri.log mol=C2Si3(2-,3)

UB3LYP/Aug-CC-pVTZ HF=-944.621254935 HF+ZPE=-944.610871 lf=59.3300

14 0.007937 3.592195 0.000000

6 0.002979 1.799444 0.000000

6 0.000000 0.537553 0.000000

14 -0.003367 -1.229608 0.000000

14 -0.005846 -3.364158 0.000000

C2Si32-\_005-tri.log mol=C2Si3(2-,3)

UB3LYP/Aug-CC-pVTZ HF=-944.617223490 HF+ZPE=-944.607044 lf=74.1424

14 2.719459 -1.077429 0.000000

6 1.128417 -0.284441 0.000000

6 0.000000 0.320759 0.000000

14 -1.851452 -0.556527 0.000000

14 -1.351614 1.618390 0.000000

C2Si32-\_108-tri.log mol=C2Si3(2-,3)

UB3LYP/Aug-CC-pVTZ HF=-944.608097651 HF+ZPE=-944.596638 lf=115.5569

6 0.658741 -0.912465 0.000000

6 -0.658852 -0.914105 0.000000

14 2.229052 -0.132362 0.000000

14 -2.229005 -0.133320 0.000000

14 0.000000 1.048497 0.000000

C2Si32-\_034-tri.log mol=C2Si3(2-,3)

UB3LYP/Aug-CC-pVTZ HF=-944.596669192 HF+ZPE=-944.587025 lf=86.9085

14 -1.470295 -1.118898 -0.170963

14 0.550010 -0.000126 0.611932

14 -1.470199 1.119005 -0.170857

6 2.182551 -0.000107 -0.150017

6 3.395244 0.000151 -0.480245

C2Si32-\_136-tri.log mol=C2Si3(2-,3)

UB3LYP/Aug-CC-pVTZ HF=-944.594810453 HF+ZPE=-944.584244 lf=127.6744

14 1.933608 -1.246237 0.000000

6 0.000000 1.066665 0.000000

6 1.035579 0.256814 0.000000

14 -1.674981 1.576574 0.000000

14 -0.702447 -0.897542 0.000000

C2Si32-\_001-tri.log mol=C2Si3(2-,3)

UB3LYP/Aug-CC-pVTZ HF=-944.589422521 HF+ZPE=-944.579296 lf=172.3140

6 -1.995558 1.015044 0.000000  
6 -1.448270 -0.134678 0.000000  
14 0.000000 1.411509 0.000000  
14 -0.235629 -1.554748 0.000000  
14 1.711555 -0.234060 0.000000

C2Si32-\_020-tri.log mol=C2Si3(2-,3)

UB3LYP/Aug-CC-pVTZ HF=-944.588891662 HF+ZPE=-944.578691 lf=135.1195

6 -1.094495 -0.387456 1.289173  
6 0.139228 -0.575875 0.886704  
14 -1.327147 -0.386475 -0.705574  
14 1.579699 -0.552177 -0.245284  
14 0.156849 1.351509 0.018339

C2Si32-\_025-tri.log mol=C2Si3(2-,3)

UB3LYP/Aug-CC-pVTZ HF=-944.587053826 HF+ZPE=-944.577167 lf=125.6560

6 1.915174 0.041690 0.869801  
6 0.929529 0.804921 0.549403  
14 0.854594 -0.845131 -0.669616  
14 -0.632063 1.312573 -0.336007  
14 -1.441690 -0.830274 0.397393

C2Si32-\_110-tri.log mol=C2Si3(2-,3)

UB3LYP/Aug-CC-pVTZ HF=-944.586884903 HF+ZPE=-944.577055 lf=100.1420

6 -0.160483 -1.223551 0.146712  
14 -1.794485 -0.429360 -0.179594  
14 1.758925 0.189455 -0.231318  
14 -0.352743 1.411291 0.194822  
6 1.066523 -1.509682 0.357498

C2Si32-\_006-tri.log mol=C2Si3(2-,3)

UB3LYP/Aug-CC-pVTZ HF=-944.586550983 HF+ZPE=-944.576825 lf=80.9372

14 -1.797721 0.848995 0.000000  
6 0.000000 1.232103 0.000000  
14 -0.673144 -1.190315 0.000000  
6 1.261859 1.069890 0.000000  
14 1.930068 -0.645249 0.000000

C2Si32-\_041-tri.log mol=C2Si3(2-,3)

UB3LYP/Aug-CC-pVTZ HF=-944.585526098 HF+ZPE=-944.576079 lf=59.9485

6 1.760740 -3.611628 0.000000  
6 1.081080 -2.555123 0.000000  
14 -0.146000 -1.252036 0.000000  
14 0.000000 0.981285 0.000000

14 -1.071922 2.913644 0.000000

C2Si32-\_013-tri.log mol=C2Si3(2-,3)

UB3LYP/Aug-CC-pVTZ HF=-944.585293906 HF+ZPE=-944.575480 lf=74.5681

6 -0.040181 0.000000 1.055338

14 1.544466 -0.004276 0.091319

14 -0.475743 -1.297776 -0.485197

14 -0.468087 1.300563 -0.484997

6 -1.361304 0.003474 0.995370

C2Si32-\_019-tri.log mol=C2Si3(2-,3)

UB3LYP/Aug-CC-pVTZ HF=-944.583901861 HF+ZPE=-944.574027 lf=101.5824

14 1.678086 -0.853855 0.000000

14 0.000000 0.516428 0.000000

14 -0.597124 -1.857489 0.000000

6 -0.946249 2.018715 0.000000

6 -1.575996 3.102758 0.000000

C2Si32-\_010-tri.log mol=C2Si3(2-,3)

UB3LYP/Aug-CC-pVTZ HF=-944.583893240 HF+ZPE=-944.574285 lf=96.3529

6 -0.505595 -2.486850 0.000000

6 -0.737969 -1.235724 0.000000

14 1.401336 -1.441565 0.000000

14 0.000000 0.485626 0.000000

14 -0.868380 2.551327 0.000000

C2Si32-\_003-tri.log mol=C2Si3(2-,3)

UB3LYP/Aug-CC-pVTZ HF=-944.583205372 HF+ZPE=-944.573638 lf=67.8604

6 -1.633886 -0.004835 0.000000

14 0.000000 0.646486 0.000000

14 -3.301620 -0.321177 0.000000

6 1.633885 -0.004829 0.000000

14 3.301621 -0.321167 0.000000

C2Si32-\_069-tri.log mol=C2Si3(2-,3)

UB3LYP/Aug-CC-pVTZ HF=-944.578731574 HF+ZPE=-944.569569 lf=78.0617

6 1.132829 2.131638 -0.000606

6 1.364496 0.885163 0.000748

14 1.832691 -0.964493 -0.000519

14 -0.335993 -0.281476 0.000889

14 -2.566980 -0.046945 -0.000431

C2Si32-\_023-tri.log mol=C2Si3(2-,3)

UB3LYP/Aug-CC-pVTZ HF=-944.571922804 HF+ZPE=-944.562704 lf=54.6864

14 -1.665881 -0.004022 -0.000005  
6 -0.042354 -0.000175 -0.967006  
6 -0.042375 -0.000510 0.967016  
14 0.847324 1.378435 0.000051  
14 0.854870 -1.374119 -0.000050

C2Si32-\_029-tri.log mol=C2Si3(2-,3)

UB3LYP/Aug-CC-pVTZ HF=-944.566649570 HF+ZPE=-944.557157 lf=124.4203  
14 2.175711 -0.000200 -0.000245  
6 0.471564 -0.694271 -0.149693  
6 0.471864 0.694208 0.150816  
14 -1.290265 -1.320969 0.033722  
14 -1.289772 1.321197 -0.033958

C2Si32-\_014-tri.log mol=C2Si3(2-,3)

UB3LYP/Aug-CC-pVTZ HF=-944.561468948 HF+ZPE=-944.551446 lf=76.9946  
14 0.000612 -2.755571 0.000000  
6 -0.702383 -1.002974 0.000000  
6 0.703124 -1.002716 0.000000  
14 0.000000 0.694093 0.000000  
14 -0.000929 2.921060 0.000000

C2Si32-\_024-tri.log mol=C2Si3(2-,3)

UB3LYP/Aug-CC-pVTZ HF=-944.561462218 HF+ZPE=-944.551926 lf=112.5880  
14 -0.000465 1.447121 0.000000  
14 1.281728 -0.707079 0.000000  
6 -0.000465 -0.035837 1.264510  
14 -1.280865 -0.709325 0.000000  
6 -0.000465 -0.035837 -1.264510

C2Si32-\_079-tri.log mol=C2Si3(2-,3)

UB3LYP/Aug-CC-pVTZ HF=-944.558096800 HF+ZPE=-944.548639 lf=61.6839  
14 -0.001122 2.398902 0.000000  
6 0.000000 0.657842 0.000000  
14 1.179569 -0.856149 0.000000  
6 0.000813 -2.258223 0.000000  
14 -1.178796 -0.856876 0.000000

C2Si32-\_064-tri.log mol=C2Si3(2-,3)

UB3LYP/Aug-CC-pVTZ HF=-944.555669133 HF+ZPE=-944.545899 lf=69.5479  
14 2.488612 -0.450251 -0.000072  
6 0.916130 0.183207 0.707952  
6 0.915985 0.183024 -0.707605  
14 -0.698458 0.922832 -0.000105

14 -2.575346 -0.629538 0.000029

C2Si32-\_031-tri.log mol=C2Si3(2-,3)

UB3LYP/Aug-CC-pVTZ HF=-944.553483283 HF+ZPE=-944.544059 lf=120.3332

14 -2.262605 -0.000152 0.132177

6 -0.541150 -0.000280 -0.205990

14 0.872978 1.301543 -0.188035

14 0.873558 -1.301395 -0.187979

6 1.745314 0.000290 0.774943

C2Si32-\_038-tri.log mol=C2Si3(2-,3)

UB3LYP/Aug-CC-pVTZ HF=-944.551341488 HF+ZPE=-944.542478 lf=48.5383

6 1.233914 0.279242 0.000436

14 2.456107 -0.926095 -0.000097

14 0.000000 1.612840 -0.000131

14 -2.456107 -0.926096 -0.000048

6 -1.233913 0.279244 0.000209

C2Si32-\_036-tri.log mol=C2Si3(2-,3)

UB3LYP/Aug-CC-pVTZ HF=-944.511451245 HF+ZPE=-944.503152 lf=48.3082

6 -2.816816 -0.286016 0.935784

14 -1.711700 0.036182 -0.518390

6 0.068433 -0.239398 -0.159861

14 1.201314 1.222712 0.137022

14 1.688264 -1.033717 0.048830

C2Si32-\_004-tri.log mol=C2Si3(2-,3)

UB3LYP/Aug-CC-pVTZ HF=-944.511027340 HF+ZPE=-944.502964 lf=64.4283

6 -3.855251 -0.006019 0.000234

14 -2.154417 -0.408834 -0.000105

14 3.228299 -0.264494 0.000047

14 -0.087230 0.662446 -0.000045

6 1.553064 0.031412 0.000006

C2Si32-\_016-tri.log mol=C2Si3(2-,3)

UB3LYP/Aug-CC-pVTZ HF=-944.508169293 HF+ZPE=-944.499818 lf=105.7720

14 -1.688287 1.264229 0.000000

6 0.000000 0.891386 0.000000

14 -0.971932 -1.103209 0.000000

14 1.334817 -0.317800 0.000000

6 3.092605 -0.525565 0.000000

C2Si32-\_071-tri.log mol=C2Si3(2-,3)

UB3LYP/Aug-CC-pVTZ HF=-944.507795624 HF+ZPE=-944.499733 lf=82.0111

6 -0.739628 -2.691066 0.000000  
14 0.155737 -1.175087 0.000000  
14 1.781827 0.455171 0.000000  
6 0.000000 0.900966 0.000000  
14 -1.620581 1.487101 0.000000

C2Si32-\_081-tri.log mol=C2Si3(2-,3)

UB3LYP/Aug-CC-pVTZ HF=-944.501473511 HF+ZPE=-944.492506 lf=108.9809  
14 2.087723 1.587525 0.000000  
14 0.017095 0.463057 0.000000  
14 -1.133364 -1.769223 0.000000  
6 -1.133364 -0.328251 1.191997  
6 -1.133364 -0.328251 -1.191997

C2Si32-\_042-tri.log mol=C2Si3(2-,3)

UB3LYP/Aug-CC-pVTZ HF=-944.497629328 HF+ZPE=-944.489779 lf=65.4762  
6 0.007775 4.092945 0.000000  
14 -0.003007 2.343139 0.000000  
6 0.000000 0.625456 0.000000  
14 -0.001077 -1.090376 0.000000  
14 0.000752 -3.274935 0.000000

C2Si32-\_053-tri.log mol=C2Si3(2-,3)

UB3LYP/Aug-CC-pVTZ HF=-944.485355731 HF+ZPE=-944.476819 lf=137.2783  
6 -1.219289 0.001338 1.172904  
14 -0.354575 1.205709 -0.000021  
14 -0.357665 -1.205503 0.000020  
14 1.757350 -0.001311 -0.000002  
6 -1.219301 0.001240 -1.172899

C2Si32-\_021-tri.log mol=C2Si3(2-,3)

UB3LYP/Aug-CC-pVTZ HF=-944.484193355 HF+ZPE=-944.475920 lf=120.0902  
6 -2.815177 -0.233814 -0.434573  
14 -1.074093 -0.003235 0.106320  
6 0.187491 -1.086577 0.897839  
14 0.737995 1.422780 0.050363  
14 1.462248 -0.853663 -0.355226

C2Si32-\_072-tri.log mol=C2Si3(2-,3)

UB3LYP/Aug-CC-pVTZ HF=-944.439748196 HF+ZPE=-944.432902 lf=92.4514  
6 0.000000 2.659351 -1.361751  
14 0.000000 1.309763 -0.248081  
14 0.000000 0.000000 1.663378  
14 0.000000 -1.309763 -0.248081



6 0.000000 -2.659351 -1.361751

C2Si32-\_105-tri.log mol=C2Si3(2-,3)

UB3LYP/Aug-CC-pVTZ HF=-944.435439139 HF+ZPE=-944.428726 lf=59.8481

6 -3.763201 -0.124424 0.000757

14 -2.028757 -0.311121 -0.000266

14 0.000000 0.728891 -0.000116

14 2.028757 -0.311121 -0.000266

6 3.763200 -0.124424 0.000757

C2Si32-\_134-tri.log mol=C2Si3(2-,3)

UB3LYP/Aug-CC-pVTZ HF=-944.410032681 HF+ZPE=-944.403609 lf=59.4186

6 0.000386 2.004152 1.459198

14 0.000386 0.925065 0.000000

14 1.099243 -1.321746 0.000000

6 0.000386 2.004152 -1.459198

14 -1.099961 -1.321164 0.000000

C2Si32-\_011-tri.log mol=C2Si3(2-,3)

UB3LYP/Aug-CC-pVTZ HF=-944.395889177 HF+ZPE=-944.388911 lf=54.6101

6 1.591146 -2.476602 0.000000

14 0.000007 -1.581109 0.000000

6 -1.590698 -2.477337 0.000000

14 0.000000 0.793689 0.000000

14 -0.000199 2.910537 0.000000

S6. Table S6. Cartesian coordinates of the isomers in Table S3 at the level of B3LYP/6-31g(d).

"mol"----"Stoichiometry"

"lf"----"lowest frequency(cm-1)"

"HF"----"total energy(a.u.)"

"HF+ZPE"----"zero-point energy corrected total energy(a.u.)"

#####

C2Si3-CpMg-cage-1.log mol=C12H10Mg2Si3

RB3LYP/6-31G(d) HF=-1731.90878951 HF+ZPE=-1731.727784 lf=7.5572

6 0.004210 1.989604 0.942233

14 0.005665 3.759517 0.881093s

14 -1.158466 2.243940 -0.847851

14 1.157404 2.240886 -0.854542

6 0.000576 0.785383 0.320952

6 -4.089036 -1.038815 0.214778

6 -3.594198 -1.523597 -1.027535

6 -2.496357 -2.391903 -0.755885

6 -2.318637 -2.446785 0.655708

6 -3.298338 -1.607161 1.256247

1 -4.933978 -0.373745 0.347333

1 -3.997044 -1.293280 -2.006564

1 -1.929167 -2.949341 -1.492135

1 -1.581712 -3.041427 1.182320

1 -3.443101 -1.456724 2.319611

6 4.091944 -1.042227 0.176916

6 3.566392 -1.553281 -1.042024

6 2.472927 -2.411692 -0.724801

6 2.328393 -2.433748 0.691344

6 3.324379 -1.583918 1.249361

1 4.941597 -0.377054 0.274220

1 3.947287 -1.347397 -2.035187

1 1.886944 -2.983861 -1.434563

1 1.601778 -3.012872 1.248678

1 3.494529 -1.409676 2.305303

12 1.897488 -0.235446 -0.041895

12 -1.897913 -0.233435 -0.037655

CpMg-020-d2-t4.log mol=C12H10Mg2Si3

RB3LYP/6-31G(d) HF=-1731.90588749 HF+ZPE=-1731.725001 lf=3.1288

6 1.065874 1.083167 0.010284

6 0.441051 2.305554 -0.000127

14 -0.474391 1.034264 -1.319293

14 -1.089597 3.189861 -0.011269  
14 -0.483751 1.049606 1.327841  
6 -4.384038 -1.012636 -1.066732  
6 -3.577344 -2.169939 -0.880350  
6 -3.432080 -2.384652 0.520404  
6 -4.151122 -1.360672 1.199063  
6 -4.737533 -0.510878 0.218766  
1 -4.696845 -0.601257 -2.019097  
1 -3.171355 -2.795672 -1.666454  
1 -2.899685 -3.204833 0.987571  
1 -4.254678 -1.259440 2.272896  
1 -5.369718 0.346795 0.415984  
6 4.252800 -1.410977 -1.152153  
6 3.795888 -2.099237 0.009368  
6 4.275554 -1.397922 1.153879  
6 5.026956 -0.275862 0.699471  
6 5.012807 -0.283977 -0.725577  
1 4.079114 -1.710093 -2.178939  
1 3.217905 -3.015668 0.020237  
1 4.122898 -1.685680 2.187234  
1 5.546715 0.438488 1.326821  
1 5.519639 0.423331 -1.371217  
12 2.816121 0.016436 0.008162  
12 -2.395998 -0.321438 0.003946

CpMg-015-d1-d2.log mol=C12H10Mg2Si3

RB3LYP/6-31G(d) HF=-1731.89576035 HF+ZPE=-1731.714966 If=4.3669

14 1.141966 2.547823 -0.007364  
6 -0.000431 1.063219 -0.015055  
14 -1.141853 2.548654 -0.008495  
6 -0.000273 -0.340072 -0.024624  
14 -0.000307 -2.038668 -0.039519  
6 -4.276240 -0.277591 -1.123303  
6 -3.848358 -1.577715 -0.722476  
6 -3.820790 -1.612609 0.697716  
6 -4.231004 -0.334108 1.178138  
6 -4.522099 0.485215 0.051974  
1 -4.432098 0.055607 -2.142699  
1 -3.612826 -2.402986 -1.383701  
1 -3.559477 -2.468739 1.308033  
1 -4.346880 -0.051511 2.217963  
1 -4.870363 1.509976 0.083881  
6 4.276104 -0.275440 -1.123222  
6 3.849497 -1.576467 -0.724043

6 3.822135 -1.613225 0.696123  
6 4.231118 -0.334907 1.178133  
6 4.521345 0.486056 0.053001  
1 4.431367 0.059236 -2.142231  
1 3.614872 -2.401130 -1.386359  
1 3.561769 -2.470401 1.305389  
1 4.346885 -0.053597 2.218321  
1 4.868439 1.511177 0.086186  
12 2.212376 -0.027958 -0.004682  
12 -2.212791 -0.026299 -0.005623

C2Si3-CpMg-planar-1.log mol=C12H10Mg2Si3

RB3LYP/6-31G(d) HF=-1731.89571211 HF+ZPE=-1731.714912 lf=4.5476

14 -0.015966 -2.042355 -0.019820  
6 -0.003004 -0.343498 -0.011142  
6 0.006107 1.060147 -0.006371  
14 -1.134434 2.547494 -0.007572  
14 1.149661 2.542732 -0.001209  
6 -4.275877 -0.277817 -1.131175  
6 -3.843899 -1.575360 -0.726509  
6 -3.821660 -1.607709 0.693735  
6 -4.239460 -0.330369 1.170429  
6 -4.529856 0.485697 0.041914  
1 -4.429728 0.053291 -2.151574  
1 -3.602533 -2.400634 -1.385574  
1 -3.559191 -2.461672 1.306482  
1 -4.360905 -0.046521 2.209271  
1 -4.882998 1.508936 0.070551  
6 3.794935 -1.786249 -0.257666  
6 4.117906 -0.764603 -1.196415  
6 4.485500 0.402211 -0.466717  
6 4.376709 0.106998 0.919365  
6 3.948706 -1.247131 1.049243  
1 3.505453 -2.802053 -0.497259  
1 4.130427 -0.871809 -2.274846  
1 4.800673 1.346881 -0.892358  
1 4.606935 0.783746 1.733550  
1 3.805012 -1.783269 1.979980  
12 2.208784 -0.047385 -0.007031  
12 -2.217071 -0.013531 -0.007133

CpMg-023-d2-t2.log mol=C12H10Mg2Si3

RB3LYP/6-31G(d) HF=-1731.88997558 HF+ZPE=-1731.709931 lf=8.1222

14 -0.003672 1.750371 -0.810374

6 -0.743150 0.002528 -1.092922  
6 0.742759 0.007774 -1.092329  
14 0.002484 -1.741768 -0.819107  
14 0.000168 -0.000418 1.004640  
6 4.661145 0.770656 -0.629683  
6 4.489624 1.125238 0.740483  
6 4.399764 -0.076873 1.497950  
6 4.509586 -1.174263 0.597194  
6 4.673758 -0.649624 -0.718158  
1 4.788856 1.460644 -1.455404  
1 4.467513 2.132397 1.139814  
1 4.282506 -0.144671 2.572852  
1 4.506475 -2.223495 0.868315  
1 4.811430 -1.229746 -1.622940  
6 -4.666393 -0.697507 -0.689302  
6 -4.498975 -1.162385 0.648014  
6 -4.500203 1.141262 0.690093  
6 -4.666844 0.725069 -0.663542  
1 -4.797174 -1.318178 -1.567848  
1 -4.486282 -2.198542 0.965095  
1 -4.799260 1.377353 -1.518613  
6 -4.400236 -0.025555 1.499630  
1 -4.284196 -0.045309 2.576635  
1 -4.489126 2.165276 1.044508  
12 2.551454 -0.003545 0.041236  
12 -2.550744 0.002858 0.043829

CpMg-015-d1-s1.log mol=C12H10Mg2Si3

RB3LYP/6-31G(d) HF=-1731.88957608 HF+ZPE=-1731.708618 lf=12.0635

14 -0.438233 -0.353843 -0.009054  
6 0.372412 1.279611 -0.002400  
14 -1.304919 2.004692 -0.000324  
6 1.629391 1.854374 -0.000366  
14 3.038272 2.800252 0.002168  
6 4.431444 -1.473067 -1.148124  
6 3.225534 -2.097369 -0.716444  
6 3.218332 -2.099755 0.709072  
6 4.419750 -1.476861 1.155030  
6 5.168418 -1.092122 0.007844  
1 4.745485 -1.338571 -2.176464  
1 2.463127 -2.526185 -1.355330  
1 2.449520 -2.530701 1.338772  
1 4.723339 -1.345856 2.186955  
1 6.136154 -0.605121 0.013546

6 -5.397214 0.407862 -0.174729  
6 -5.156704 -0.205161 1.087353  
6 -4.656213 -1.519075 0.850464  
6 -4.585766 -1.715826 -0.556911  
6 -5.040636 -0.523526 -1.191754  
1 -5.803189 1.399732 -0.333602  
1 -5.355380 0.235358 2.057214  
1 -4.403086 -2.250358 1.608882  
1 -4.267235 -2.622255 -1.057754  
1 -5.138232 -0.368017 -2.259689  
12 3.130483 0.123967 -0.000462  
12 -3.085039 0.009536 -0.002521

C2Si3-CpMg-planar-C-C.log mol=C12H10Mg2Si3

RB3LYP/6-31G(d) HF=-1731.88709457 HF+ZPE=-1731.706369 If=12.1483

6 0.526164 -1.233934 -0.044722  
6 -0.687731 -1.506258 -0.043470  
14 -3.949271 0.041872 0.045304  
14 -2.487014 -1.724968 -0.029914  
14 -4.640365 -2.254453 0.011295  
6 4.518657 -0.559407 -1.191427  
6 4.357318 0.521000 -0.275257  
6 4.408414 -0.011343 1.046382  
6 4.602740 -1.420397 0.946431  
6 4.671140 -1.758643 -0.435916  
1 4.557522 -0.478087 -2.271171  
1 4.252397 1.567465 -0.535467  
1 4.351141 0.559468 1.965531  
1 4.714571 -2.108071 1.776210  
1 4.843209 -2.748700 -0.841093  
6 0.422077 2.301959 0.686163  
6 -0.804446 2.866431 1.144723  
6 -1.574394 3.225053 0.007096  
6 -0.840341 2.867797 -1.154618  
6 0.399697 2.303053 -0.735632  
1 1.242643 1.978096 1.316542  
1 -1.081231 3.029349 2.179679  
1 -2.561645 3.669126 0.023122  
1 -1.149890 3.030868 -2.180215  
1 1.198302 1.976140 -1.391967  
12 2.546715 -0.911670 -0.012419  
12 -1.320855 0.834849 0.002980

CpMg-001-t1-s4.log mol=C12H10Mg2Si3

RB3LYP/6-31G(d) HF=-1731.88692543 HF+ZPE=-1731.706417 If=15.6245

6 -0.147457 -0.937203 -0.003389  
6 1.028482 -1.383286 -0.007238  
14 2.612751 -2.365115 -0.011098  
14 3.407892 0.004131 0.010771  
14 4.862397 -1.642797 0.004647  
6 -0.805424 2.584170 0.694087  
6 -0.788247 2.586855 -0.724624  
6 0.474636 3.094117 -1.149488  
6 1.228101 3.418989 0.010784  
6 0.446891 3.089463 1.151374  
1 -1.636520 2.289161 1.324939  
1 -1.603240 2.293147 -1.376697  
1 0.784146 3.253006 -2.175845  
1 2.227196 3.837063 0.023675  
1 0.731445 3.244811 2.185474  
6 -4.222759 0.200592 -0.123525  
6 -4.190901 -0.753432 -1.182366  
6 -4.144419 -2.054375 -0.601489  
6 -4.145531 -1.905063 0.814638  
6 -4.192915 -0.511410 1.111171  
1 -4.296327 1.275652 -0.236555  
1 -4.235812 -0.530725 -2.241845  
1 -4.139923 -2.993046 -1.142669  
1 -4.142078 -2.710234 1.539643  
1 -4.240019 -0.072576 2.100762  
12 -2.191623 -0.928455 -0.002907  
12 0.937108 1.060969 0.002825

CpMg-001-d1-t2.log mol=C12H10Mg2Si3

RB3LYP/6-31G(d) HF=-1731.88632847 HF+ZPE=-1731.705404 If=12.4377

6 1.177352 -0.900799 -0.009443  
6 -0.000739 -1.281580 -0.007918  
14 -3.917227 -1.241601 0.006018  
14 -1.698931 -1.871700 -0.003380  
14 -3.188981 -3.517034 0.001166  
6 5.360451 -1.123459 -0.378442  
6 5.105156 0.006953 -1.208134  
6 4.844789 1.124200 -0.362179  
6 4.938647 0.683930 0.990101  
6 5.257637 -0.705154 0.980003  
1 5.619852 -2.118353 -0.720271  
1 5.137970 0.021996 -2.291028  
1 4.645853 2.137821 -0.689316

1 4.822240 1.303884 1.871075  
1 5.424661 -1.326505 1.851758  
6 -2.982313 3.083978 -0.721370  
6 -1.655340 2.785612 -1.148700  
6 -0.849239 2.611720 0.012233  
6 -1.678981 2.792642 1.155373  
6 -2.996813 3.088399 0.699178  
1 -3.827834 3.289647 -1.366838  
1 -1.312149 2.738135 -2.175503  
1 0.208891 2.382328 0.023714  
1 -1.356933 2.751470 2.189277  
1 -3.855455 3.297509 1.325934  
12 3.164129 -0.449570 -0.006903  
12 -2.444027 0.895245 0.000546

CpMg-023-d1-t1.log mol=C12H10Mg2Si3

RB3LYP/6-31G(d) HF=-1731.88524230 HF+ZPE=-1731.705419 If=4.7659

14 0.449390 1.899818 -1.740083  
6 -0.062293 0.835823 0.001424  
6 0.960233 2.149308 0.000171  
14 0.445580 1.905496 1.739977  
14 -1.051551 2.645354 -0.002991  
6 -2.562987 -2.398241 0.067840  
6 -3.152707 -1.718568 1.171969  
6 -4.026310 -0.717163 0.656700  
6 -3.974156 -0.777099 -0.765606  
6 -3.068561 -1.815951 -1.129539  
1 -1.872731 -3.231512 0.128276  
1 -2.992686 -1.945999 2.219346  
1 -4.644571 -0.048068 1.243230  
1 -4.546476 -0.162105 -1.449906  
1 -2.833984 -2.130572 -2.139641  
6 3.065615 -1.740676 -1.167133  
6 3.954258 -0.743727 -0.670866  
6 3.915571 -0.789539 0.753077  
6 3.003016 -1.814861 1.135326  
6 2.478703 -2.401961 -0.051075  
1 2.889170 -1.972622 -2.210825  
1 4.573221 -0.086316 -1.269728  
1 4.500685 -0.173704 1.425630  
1 2.771289 -2.113419 2.150927  
1 1.776160 -3.225890 -0.096976  
12 -1.853530 -0.162074 -0.000143  
12 1.802677 -0.139861 0.002584



CpMg-001-d1-t5.log mol=C12H10Mg2Si3

RB3LYP/6-31G(d) HF=-1731.88427783 HF+ZPE=-1731.703284 lf=8.7160

6 -2.819922 -0.021918 0.006790  
6 -1.585630 -0.022275 0.003369  
14 1.923355 -1.389432 -0.033684  
14 0.201090 -0.018307 0.003399  
14 1.912894 1.365752 -0.034589  
6 6.228525 -1.177020 -0.200200  
6 6.202478 -0.565234 1.083719  
6 6.196058 0.849179 0.897879  
6 6.214761 1.108757 -0.499632  
6 6.228669 -0.143674 -1.180499  
1 6.256725 -2.241863 -0.397695  
1 6.221536 -1.082536 2.035721  
1 6.202690 1.594968 1.683879  
1 6.232141 2.086951 -0.965089  
1 6.276823 -0.284529 -2.253931  
6 -6.834033 0.874561 -0.849908  
6 -6.834121 1.092055 0.558489  
6 -6.849421 -0.180253 1.200751  
6 -6.858812 -1.184164 0.189081  
6 -6.849014 -0.532237 -1.078272  
1 -6.850762 1.643665 -1.612878  
1 -6.851670 2.055511 1.053878  
1 -6.881965 -0.353469 2.269822  
1 -6.899417 -2.254204 0.354382  
1 -6.880526 -1.019964 -2.045276  
12 -4.857599 -0.009239 0.008469  
12 4.192136 -0.002708 -0.008801

CpMg-002-s1-t3.log mol=C12H10Mg2Si3

RB3LYP/6-31G(d) HF=-1731.88424290 HF+ZPE=-1731.704254 lf=16.1154

6 -0.002652 -1.330521 1.167531  
14 -0.007054 -2.765032 0.260533  
6 0.002586 1.358395 1.149456  
14 0.005486 2.782094 0.225711  
14 0.002209 0.021699 2.451126  
6 2.963680 -0.698737 -1.704432  
6 2.990842 0.729644 -1.670725  
6 3.603854 1.126147 -0.452450  
6 3.945984 -0.049767 0.273569  
6 3.561343 -1.175600 -0.507279  
1 2.597321 -1.308444 -2.521953

1 2.646719 1.390843 -2.457277  
1 3.789397 2.145454 -0.135123  
1 4.455035 -0.081918 1.229843  
1 3.707919 -2.215266 -0.239542  
6 -2.973193 -0.735101 -1.678959  
6 -2.977248 0.693729 -1.696449  
6 -3.586047 1.143555 -0.494381  
6 -3.947183 0.000027 0.272810  
6 -3.579118 -1.159133 -0.466591  
1 -2.613611 -1.379122 -2.472813  
1 -2.623153 1.320986 -2.506048  
1 -3.756333 2.176391 -0.214426  
1 -4.458172 0.010404 1.228539  
1 -3.742025 -2.185805 -0.160851  
12 1.573336 0.002012 0.080329  
12 -1.575765 0.011987 0.084160

CpMg-020-d2-t3.log mol=C12H10Mg2Si3

RB3LYP/6-31G(d) HF=-1731.88283633 HF+ZPE=-1731.702066 If=9.4820

6 -1.378430 -0.045292 1.025728  
6 -0.076297 -0.033717 0.994100  
14 -0.820101 -1.116837 -0.841500  
14 1.148096 0.127099 -0.356915  
14 -0.851832 1.392204 -0.581854  
6 5.786942 0.293516 -0.965562  
6 5.674711 -1.058231 -0.527507  
6 5.522747 -1.051012 0.889352  
6 5.541305 0.305751 1.327405  
6 5.705390 1.136440 0.180846  
1 5.945575 0.620617 -1.986258  
1 5.730068 -1.938342 -1.156973  
1 5.442743 -1.924200 1.525697  
1 5.479865 0.643904 2.354885  
1 5.789313 2.216624 0.184301  
6 -5.333288 -1.160657 0.637338  
6 -5.228170 -0.907812 -0.760906  
6 -5.238875 0.504005 -0.954138  
6 -5.350706 1.121722 0.325895  
6 -5.410603 0.092238 1.306817  
1 -5.372020 -2.137029 1.105806  
1 -5.174613 -1.656769 -1.541899  
1 -5.198718 1.016633 -1.907768  
1 -5.409938 2.187040 0.514882  
1 -5.514580 0.237440 2.375621

12 -3.306113 -0.028430 0.241129  
12 3.666752 0.021584 -0.026189

CpMg-002-s1-t1.log mol=C12H10Mg2Si3

RB3LYP/6-31G(d) HF=-1731.88109520 HF+ZPE=-1731.700930 If=6.3365

6 -0.311238 -0.276342 -0.035630  
14 -0.428107 -1.971679 -0.063236  
6 1.400736 2.080728 -0.014603  
14 2.773599 3.061104 -0.000590  
14 -0.314252 1.588113 -0.030853  
6 -4.380933 -0.957973 0.892240  
6 -4.557512 0.441701 1.099091  
6 -4.666626 1.064040 -0.176722  
6 -4.547447 0.052560 -1.172120  
6 -4.376311 -1.197998 -0.509723  
1 -4.296117 -1.710447 1.667311  
1 -4.632534 0.939895 2.058408  
1 -4.822748 2.120626 -0.357876  
1 -4.619508 0.201638 -2.243083  
1 -4.286232 -2.165382 -0.989264  
6 3.049329 -2.079045 0.713654  
6 3.870715 -1.015545 1.183607  
6 4.420778 -0.354331 0.052858  
6 3.927624 -0.992524 -1.116558  
6 3.084038 -2.064554 -0.709200  
1 2.528837 -2.801226 1.331595  
1 4.074987 -0.780261 2.221718  
1 5.103162 0.486435 0.078180  
1 4.181831 -0.736009 -2.138481  
1 2.594639 -2.773647 -1.366518  
12 2.032468 -0.030054 -0.002942  
12 -2.511017 0.157432 -0.011878

C2Si3-CpMg-1-ptSi.log mol=C12H10Mg2Si3

RB3LYP/6-31G(d) HF=-1731.88082321 HF+ZPE=-1731.700342 If=5.0456

14 -0.020040 2.174505 -0.371688  
14 -0.001363 0.026501 -1.585237  
6 -0.009459 0.669282 0.618707  
14 0.021519 -2.143310 -0.402372  
6 0.006133 -0.652058 0.612079  
6 -4.025205 -1.139744 0.842591  
6 -3.870123 0.079324 1.563771  
6 -4.120740 1.155782 0.664648  
6 -4.429175 0.602019 -0.609812

6 -4.369612 -0.815795 -0.500572  
1 -3.925182 -2.138186 1.251565  
1 -3.634267 0.170167 2.617517  
1 -4.103630 2.210269 0.913488  
1 -4.683025 1.161924 -1.502101  
1 -4.573570 -1.525143 -1.293797  
6 3.939423 -0.747129 1.319931  
6 3.890738 0.676076 1.368824  
6 4.217306 1.171374 0.073632  
6 4.466877 0.055539 -0.774147  
6 4.295984 -1.129477 -0.004905  
1 3.767332 -1.418582 2.152851  
1 3.674896 1.275978 2.244995  
1 4.286988 2.214752 -0.210303  
1 4.756040 0.101241 -1.817389  
1 4.435660 -2.144149 -0.358495  
12 2.200941 -0.037014 -0.091164  
12 -2.197253 0.014750 -0.076891

CpMg-015-d1-t1.log mol=C12H10Mg2Si3

RB3LYP/6-31G(d) HF=-1731.87578275 HF+ZPE=-1731.694873 lf=12.4509

14 -0.323058 2.260593 -0.002040  
6 1.478497 2.036196 -0.000617  
14 1.182760 3.924062 0.001369  
6 2.635591 1.314266 -0.000357  
14 4.232405 0.705187 0.000363  
6 -3.789519 -0.755851 -1.150960  
6 -3.349027 -1.465589 0.004117  
6 -3.791264 -0.749245 1.154436  
6 -4.506529 0.400391 0.709517  
6 -4.505453 0.396314 -0.713715  
1 -3.643562 -1.061398 -2.180244  
1 -2.805090 -2.402414 0.007178  
1 -3.646806 -1.048867 2.185671  
1 -4.992189 1.132486 1.343617  
1 -4.990164 1.124737 -1.352749  
6 0.414242 -2.313528 -0.712723  
6 1.611548 -2.947614 -1.150925  
6 2.347921 -3.339813 -0.000306  
6 1.612981 -2.947213 1.151081  
6 0.415146 -2.313276 0.714187  
1 -0.377344 -1.945699 -1.354804  
1 1.897198 -3.122287 -2.181321  
1 3.302624 -3.851786 -0.000807

1 1.899989 -3.121417 2.181179  
1 -0.375557 -1.945039 1.357121  
12 -2.279772 0.613911 -0.001077  
12 2.196155 -0.956105 -0.000835

CpMg-009-d1-d3.log mol=C12H10Mg2Si3

RB3LYP/6-31G(d) HF=-1731.87568264 HF+ZPE=-1731.694725 lf=20.7460

14 -2.436479 1.979417 -1.360445  
14 -0.111058 2.151529 -0.749674  
6 -1.932112 1.931019 0.417923  
14 0.806029 2.435709 1.465165  
6 -0.943623 2.092665 1.238642  
6 2.849944 -1.399582 -1.329537  
6 3.679532 -0.247367 -1.224903  
6 4.053152 -0.095745 0.139030  
6 3.453926 -1.152199 0.880647  
6 2.709875 -1.959746 -0.027342  
1 2.429143 -1.799139 -2.244549  
1 3.995143 0.385423 -2.046005  
1 4.697798 0.676752 0.540876  
1 3.573498 -1.331727 1.942502  
1 2.173794 -2.868002 0.221233  
6 -1.178354 -2.616569 -0.343442  
6 -1.073637 -2.154182 1.004584  
6 -2.389754 -1.865962 1.471358  
6 -3.299109 -2.138499 0.413721  
6 -2.550414 -2.602986 -0.705756  
1 -0.357835 -2.947226 -0.968388  
1 -0.168651 -2.114539 1.599202  
1 -2.649542 -1.518776 2.464061  
1 -4.376565 -2.032440 0.458883  
1 -2.958897 -2.905465 -1.662540  
12 -1.885677 -0.355181 -0.255247  
12 1.697899 0.169922 0.014791

CpMg-009-d1-t3.log mol=C12H10Mg2Si3

RB3LYP/6-31G(d) HF=-1731.87437513 HF+ZPE=-1731.693589 lf=15.0942

14 2.462230 -1.888917 -1.492129  
14 0.185193 -2.129243 -0.660996  
6 2.112089 -1.862207 0.298203  
14 -0.497152 -2.145493 1.700055  
6 1.214634 -1.936717 1.241338  
6 2.118944 2.010712 1.458934  
6 3.152676 2.094834 0.487040

6 2.567315 2.493989 -0.747827  
6 1.174012 2.660369 -0.543686  
6 0.889191 2.357055 0.821762  
1 2.245544 1.759983 2.505467  
1 4.204538 1.900381 0.660513  
1 3.092792 2.647262 -1.682650  
1 0.454287 2.985493 -1.285275  
1 -0.068923 2.462868 1.317696  
6 -3.022691 1.387341 -1.215409  
6 -3.050925 1.739035 0.165460  
6 -3.612627 0.645668 0.885036  
6 -3.930282 -0.381618 -0.046985  
6 -3.566839 0.076853 -1.344881  
1 -2.688622 2.023481 -2.026357  
1 -2.750459 2.691371 0.586384  
1 -3.787772 0.609370 1.953623  
1 -4.383751 -1.336883 0.189688  
1 -3.704849 -0.463621 -2.273734  
12 -1.579380 -0.074411 -0.077286  
12 1.663584 0.349375 -0.119071

CpMg-026-s1-t1.log mol=C12H10Mg2Si3

RB3LYP/6-31G(d) HF=-1731.87409076 HF+ZPE=-1731.693750 lf=14.8899

6 0.637037 -1.290718 -0.007301  
14 -0.009686 0.603727 -0.005338  
6 -0.643615 -1.294069 -0.008334  
14 1.223927 2.481762 0.000653  
14 -1.165942 2.528463 0.000322  
6 -4.490293 -1.446191 0.987340  
6 -4.690295 -0.032493 0.977873  
6 -4.760042 0.391413 -0.379180  
6 -4.593687 -0.757792 -1.207595  
6 -4.435650 -1.891821 -0.359812  
1 -4.420760 -2.072715 1.868758  
1 -4.808925 0.601316 1.848570  
1 -4.926000 1.405560 -0.720656  
1 -4.631133 -0.771680 -2.290601  
1 -4.300514 -2.916012 -0.686273  
6 4.743754 0.204235 0.705853  
6 4.744885 0.191763 -0.716714  
6 4.514747 -1.150546 -1.144821  
6 4.380139 -1.964421 0.013132  
6 4.512520 -1.130239 1.157030  
1 4.914161 1.069976 1.334145

1 4.917089 1.046220 -1.359829  
1 4.489332 -1.494694 -2.172148  
1 4.203644 -3.033255 0.022355  
1 4.485397 -1.456285 2.190208  
12 -2.611564 -0.431067 -0.004510  
12 2.601941 -0.397974 -0.002014

CpMg-015-d1-s6.log mol=C12H10Mg2Si3

RB3LYP/6-31G(d) HF=-1731.87056101 HF+ZPE=-1731.690186 lf=22.3607

14 -3.852639 0.389606 0.927277  
6 -3.064973 -1.001314 -0.117501  
14 -4.842030 -1.471922 0.030222  
6 -1.820055 -1.259533 -0.568154  
14 -0.257083 -1.562216 -1.172381  
6 1.283808 2.166460 0.697046  
6 -0.048560 2.638321 0.764055  
6 -0.505292 2.842044 -0.586703  
6 0.536735 2.471815 -1.459758  
6 1.649134 2.070101 -0.679729  
1 1.941445 2.022992 1.546788  
1 -0.564694 2.953414 1.665285  
1 -1.440445 3.315361 -0.873231  
1 0.505031 2.521701 -2.541369  
1 2.656705 1.918756 -1.058568  
6 3.008932 -2.085196 0.952570  
6 3.381951 -0.875133 1.607979  
6 4.114196 -0.082666 0.682046  
6 4.179861 -0.793701 -0.549550  
6 3.503297 -2.034759 -0.376504  
1 2.462345 -2.907648 1.398045  
1 3.188266 -0.628534 2.645566  
1 4.565337 0.881605 0.885846  
1 4.703527 -0.473708 -1.443237  
1 3.392430 -2.808484 -1.126501  
12 1.889187 -0.290586 -0.152406  
12 -1.339154 0.781367 0.128652

CpMg-001-d2-t2.log mol=C12H10Mg2Si3

RB3LYP/6-31G(d) HF=-1731.86807576 HF+ZPE=-1731.687898 lf=13.3463

6 -0.476340 -0.457011 -1.013892  
6 0.561402 -1.159195 -1.288548  
14 -0.050892 -1.684582 0.734521  
14 1.894559 -2.458529 -1.157376  
14 2.201919 -2.143909 1.215800

6 1.695531 2.580954 0.500004  
6 2.840561 2.129677 1.222338  
6 3.822733 1.726855 0.280649  
6 3.290980 1.927879 -1.026700  
6 1.980102 2.463362 -0.890307  
1 0.792390 2.994655 0.933520  
1 2.946566 2.113750 2.300488  
1 4.809352 1.344746 0.514022  
1 3.809257 1.743796 -1.960393  
1 1.321000 2.746957 -1.702166  
6 -3.733450 1.656148 0.394528  
6 -3.957539 0.591075 1.317486  
6 -4.524717 -0.500516 0.598915  
6 -4.648873 -0.110654 -0.767122  
6 -4.163329 1.222613 -0.890828  
1 -3.340792 2.636363 0.637688  
1 -3.764994 0.620137 2.383286  
1 -4.834402 -1.448505 1.021967  
1 -5.075642 -0.709460 -1.563082  
1 -4.143831 1.810613 -1.800662  
12 -2.377200 -0.145587 -0.224019  
12 1.937244 0.290431 0.016933

CpMg-020-d4-t3.log mol=C12H10Mg2Si3

RB3LYP/6-31G(d) HF=-1731.86632571 HF+ZPE=-1731.686222 lf=9.7116

6 0.486482 -2.137204 0.013738  
6 0.853552 -0.812765 -0.005618  
14 -0.641460 -1.213067 -1.333867  
14 0.178078 0.894571 -0.023404  
14 -0.627894 -1.177969 1.348712  
6 -4.543424 0.831879 -1.193076  
6 -5.006873 -0.361198 -0.570053  
6 -4.938565 -0.176255 0.840710  
6 -4.432244 1.130763 1.089262  
6 -4.186686 1.753801 -0.168043  
1 -4.495651 1.016159 -2.259797  
1 -5.376468 -1.243325 -1.079418  
1 -5.247899 -0.892716 1.592427  
1 -4.290202 1.584074 2.063183  
1 -3.823477 2.763587 -0.318359  
6 4.828464 0.160270 -1.180903  
6 4.734595 1.458135 -0.597141  
6 4.731874 1.304500 0.818664  
6 4.825306 -0.088185 1.110948



6 4.887839 -0.794087 -0.124473  
1 4.885498 -0.058798 -2.240487  
1 4.698980 2.397535 -1.135414  
1 4.693897 2.106882 1.545566  
1 4.873038 -0.530169 2.099039  
1 4.982743 -1.866948 -0.240396  
12 -2.732978 -0.093057 0.004719  
12 2.810936 0.264417 -0.013937

CpMg-073-s1-t2.log mol=C12H10Mg2Si3

RB3LYP/6-31G(d) HF=-1731.84491599 HF+ZPE=-1731.664672 lf=10.7274

14 4.215933 3.196917 0.002167  
6 2.718446 2.349430 -0.000079  
6 1.625520 1.659216 -0.004119  
14 -0.112997 1.263375 -0.004197  
14 -0.734792 -0.911024 -0.050624  
6 -5.306905 -0.553222 0.987689  
6 -5.011419 0.840379 1.004542  
6 -4.937179 1.290772 -0.344975  
6 -5.186273 0.174948 -1.195289  
6 -5.414793 -0.963904 -0.371145  
1 -5.454875 -1.182967 1.856929  
1 -4.897151 1.456800 1.888252  
1 -4.757416 2.309586 -0.666951  
1 -5.228809 0.196681 -2.277753  
1 -5.659103 -1.961228 -0.717266  
6 4.140453 -1.132150 0.665352  
6 3.320529 -2.176678 1.184367  
6 2.783015 -2.900567 0.084062  
6 3.255173 -2.297125 -1.113428  
6 4.098833 -1.204890 -0.753125  
1 4.709945 -0.418636 1.248379  
1 3.167542 -2.405041 2.232728  
1 2.124062 -3.757880 0.147386  
1 3.042426 -2.631754 -2.122023  
1 4.634974 -0.559832 -1.438783  
12 -3.197626 -0.248142 -0.015196  
12 1.918626 -0.689585 -0.007876

CpMg-011-s1-d8.log mol=C12H10Mg2Si3

RB3LYP/6-31G(d) HF=-1731.84421584 HF+ZPE=-1731.664695 lf=4.9166

6 -0.156451 0.181976 -1.838994  
14 0.917306 2.912456 -0.778333  
6 0.364289 1.293309 -1.580336

14 0.019577 1.863666 1.156334  
14 0.005157 0.060323 2.358192  
6 3.844234 -0.353476 -0.709338  
6 3.740331 -0.546978 0.697820  
6 2.990285 -1.728822 0.925629  
6 2.632992 -2.276213 -0.350619  
6 3.172198 -1.429942 -1.354325  
1 4.383341 0.446126 -1.203865  
1 4.167317 0.092085 1.461475  
1 2.769168 -2.170587 1.889488  
1 2.095252 -3.202297 -0.516827  
1 3.080710 -1.574153 -2.423937  
6 -4.011666 0.308616 -0.509092  
6 -3.767713 -0.128271 0.825639  
6 -3.322203 -1.477136 0.771422  
6 -3.299579 -1.878425 -0.598478  
6 -3.733334 -0.779484 -1.385070  
1 -4.393503 1.280054 -0.800948  
1 -3.913632 0.459215 1.723877  
1 -3.082676 -2.103424 1.622347  
1 -3.031111 -2.860556 -0.969521  
1 -3.828762 -0.768060 -2.464161  
12 1.523707 -0.219169 -0.162264  
12 -1.703288 -0.149127 -0.336918
